# Supplementary material for: Sources of high-chloride water and managed aquifer recharge in an alluvial aquifer in California, USA
Source: Springer Nature journal article supplement (doi:10.1007/s10040-015-1277-7), 2015-07-02
Supplement: MOESM1 [file 11679106]

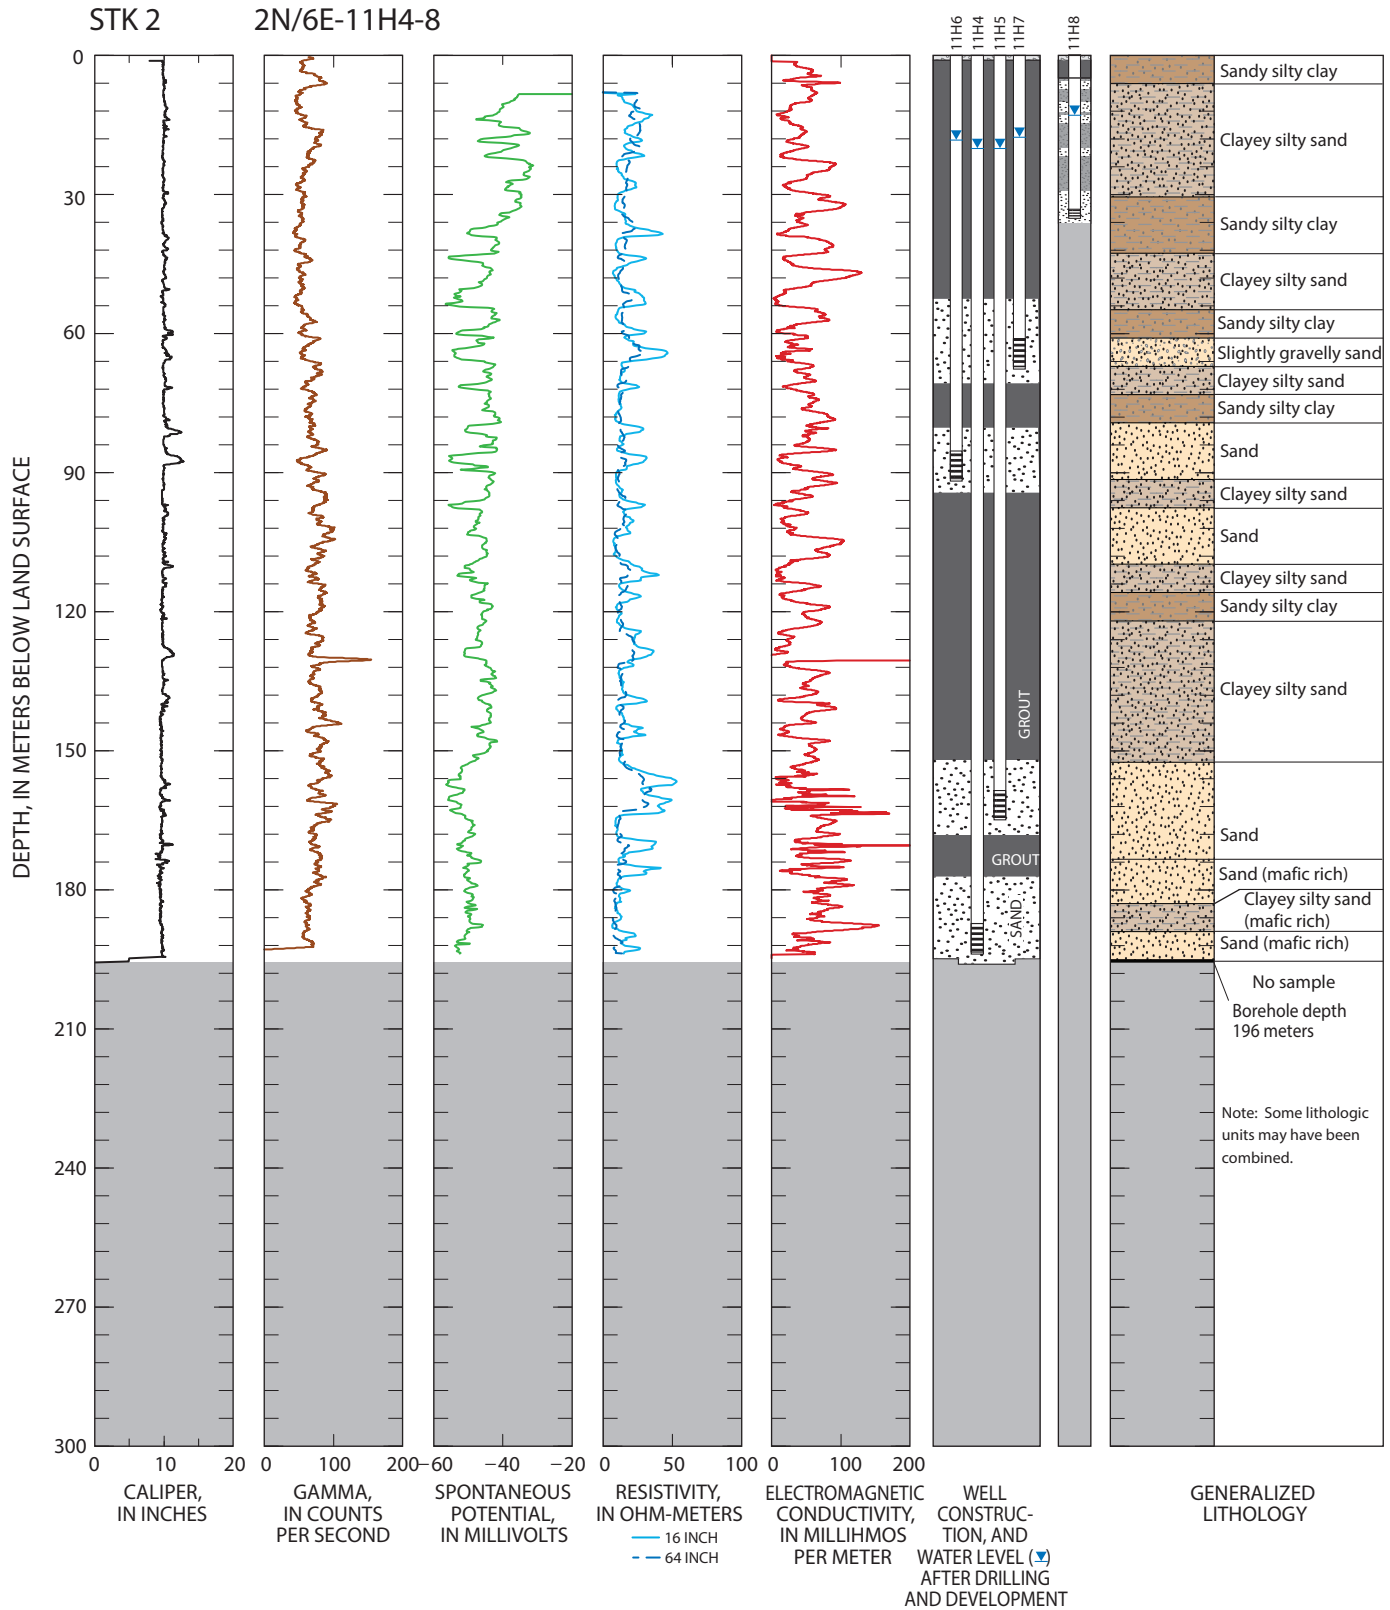

**Fig. S1** Geophysical logs, lithology, and well-construction data for multiple well site 2N/6E-11H4-8 (STK-2), Morada Lane recharge facility, Eastern San Joaquin Groundwater subs basin, California

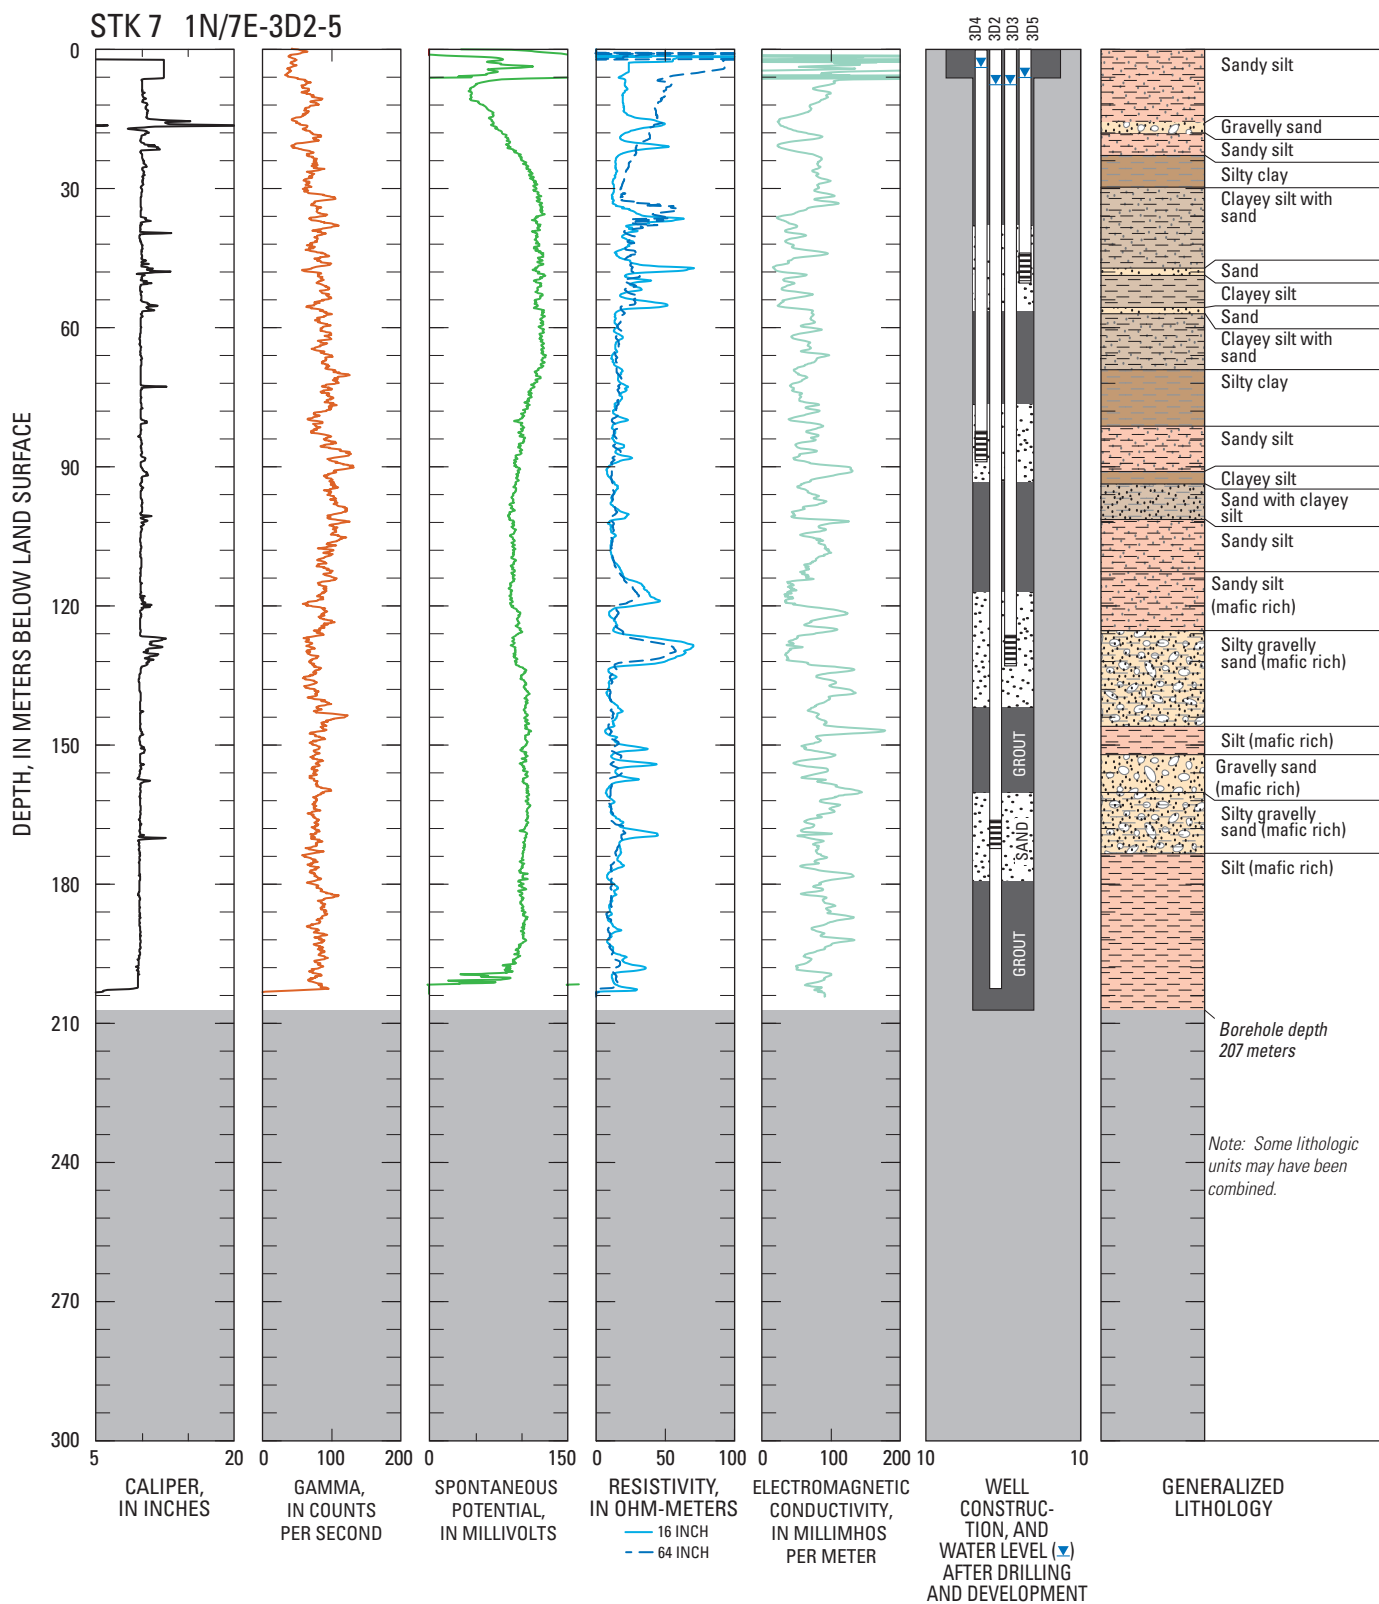

Fig. S2 Geophysical logs, lithology, and well-construction data for multiple well site 1N/7E-3D2-5 (STK-7), Stockton East recharge facility, Eastern San Joaquin Groundwater subbasin, California

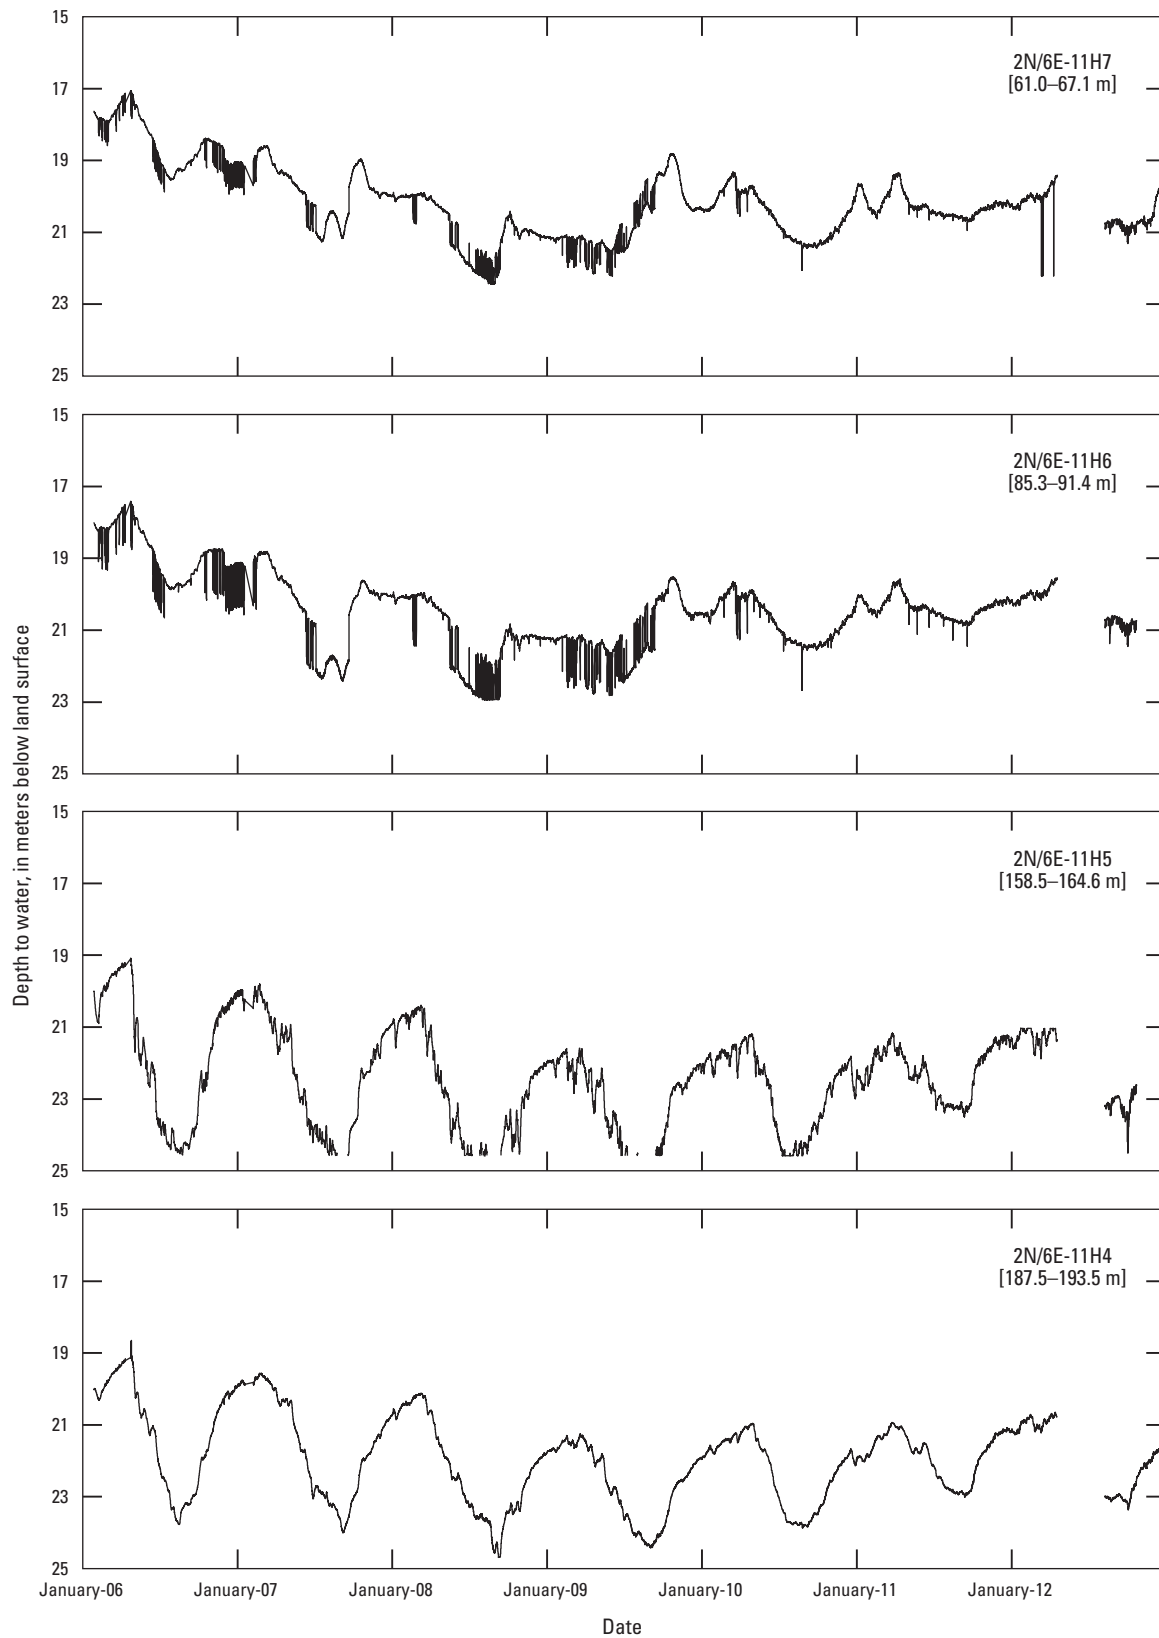

**Fig. S3** Water-level hydrographs for multiple-well monitoring site 2N/6E-11H4-7 (STK-2), Morada Lane recharge facility, Eastern San Joaquin Groundwater Subbasin, California 2006 – 2012. Screened interval in meters (m) below land surface shown in [brackets].

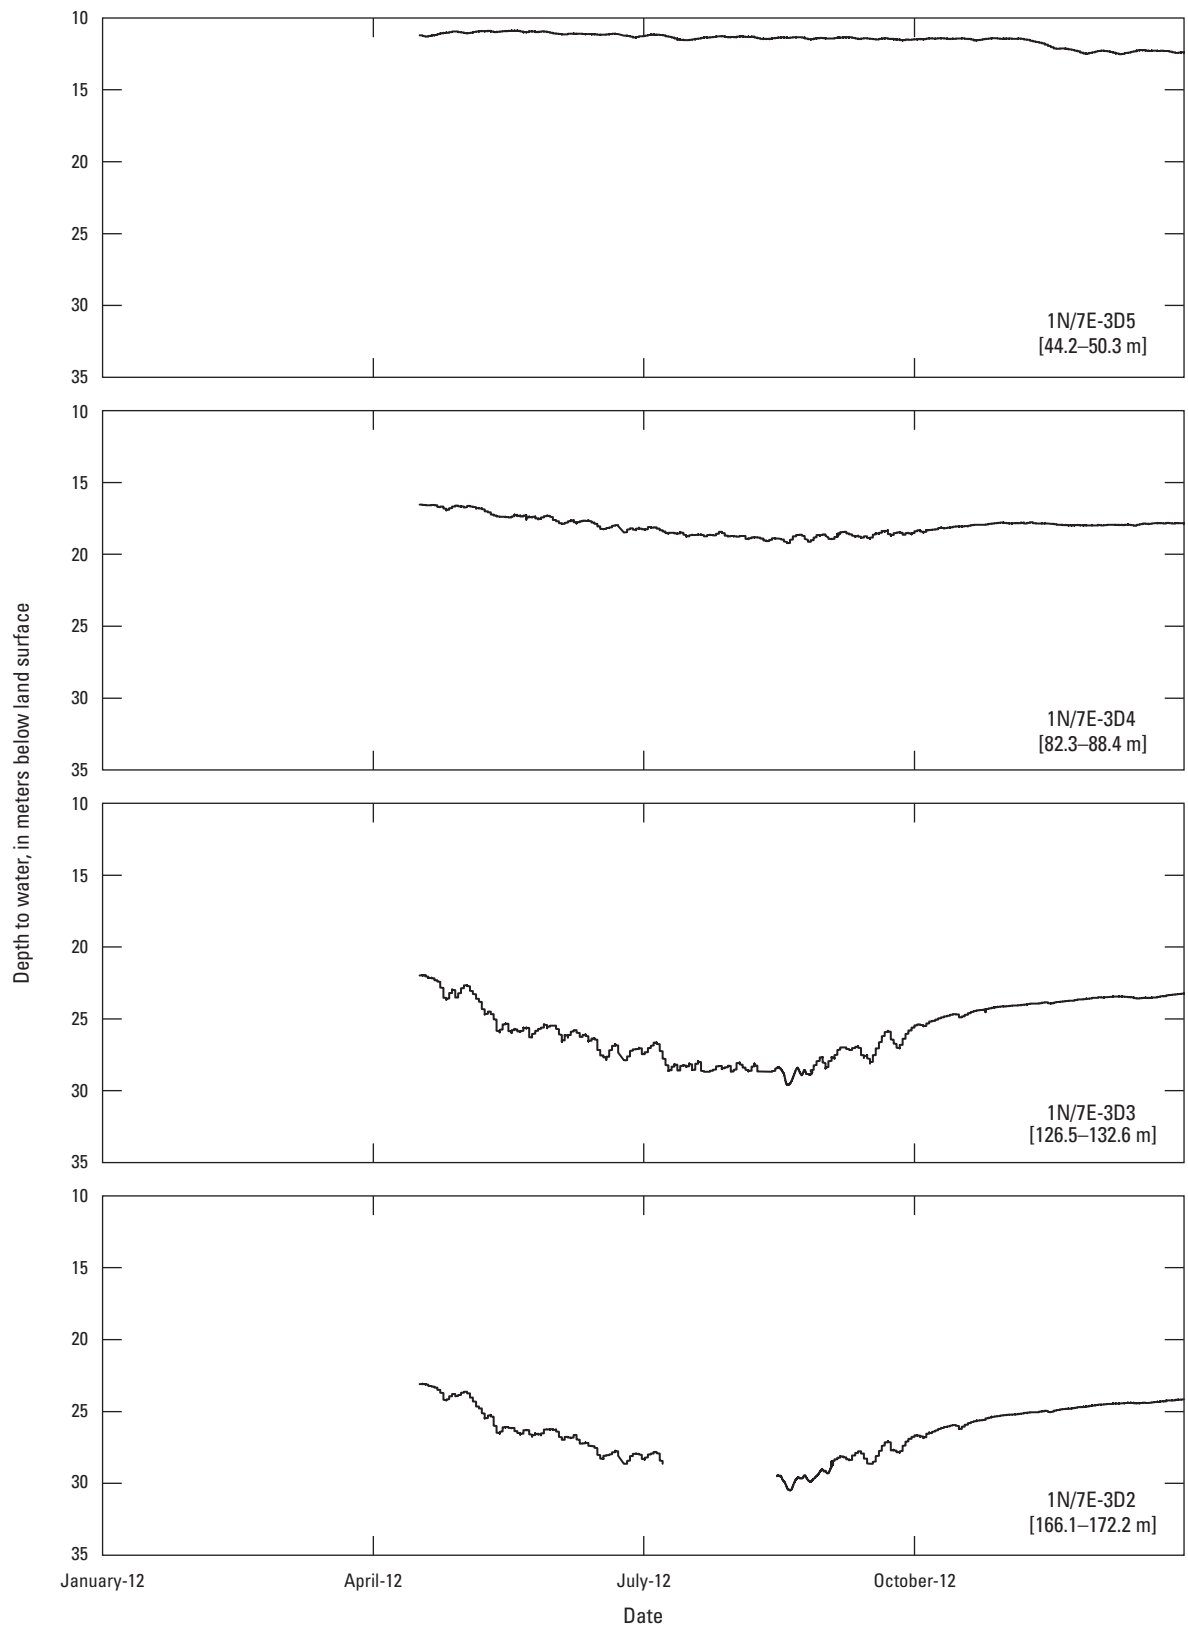

**Fig. S4** Water-level hydrographs for multiple-well monitoring site 1N/7E-3D2-5 (STK-7), Stockton East recharge facility, Eastern San Joaquin Groundwater Subbasin, California, April 2012 –December 2012. Screened interval in meters (m) below land surface shown in [brackets].

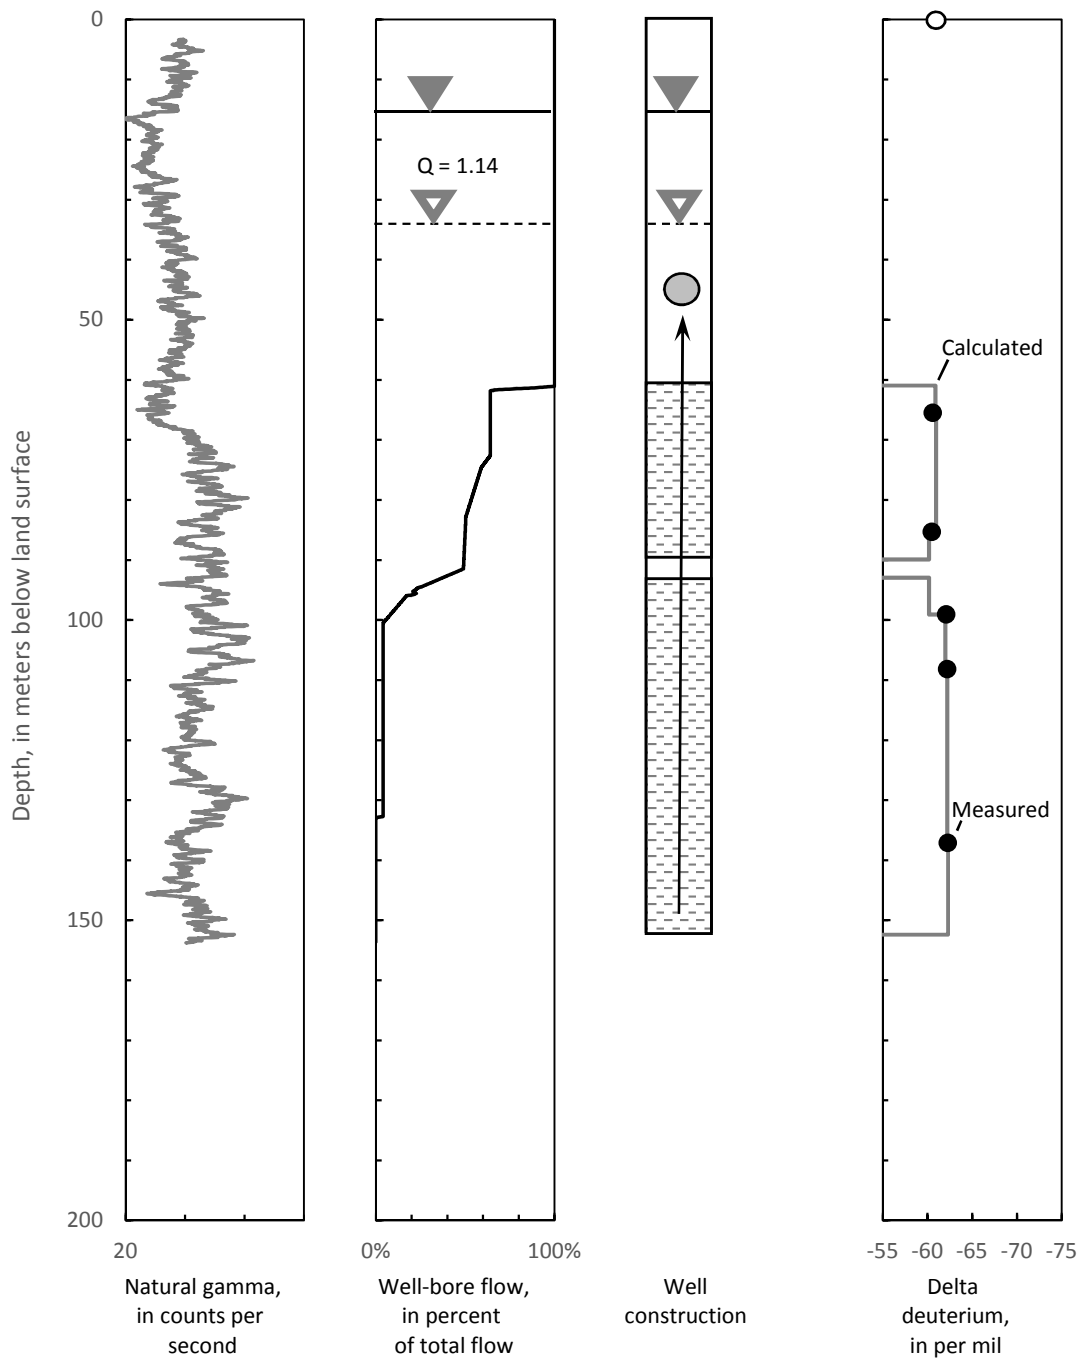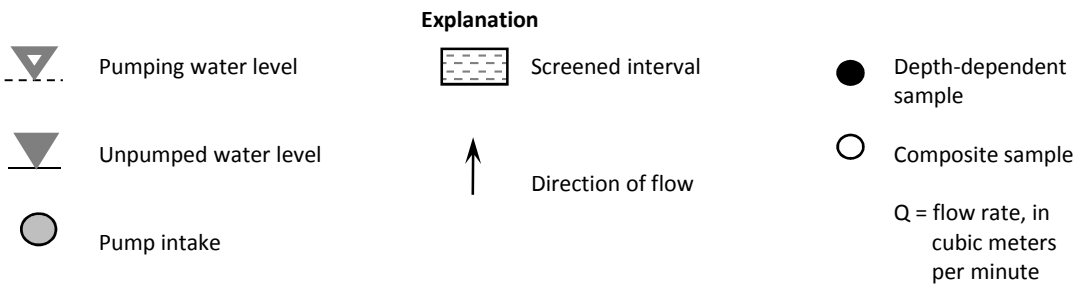

**Fig. S5** Gamma log, pumped well-bore flow, well construction, and delta-deuterium depth-dependent water-quality data from well 1N/7E-4G1, Eastern San Joaquin Groundwater subbasin, California

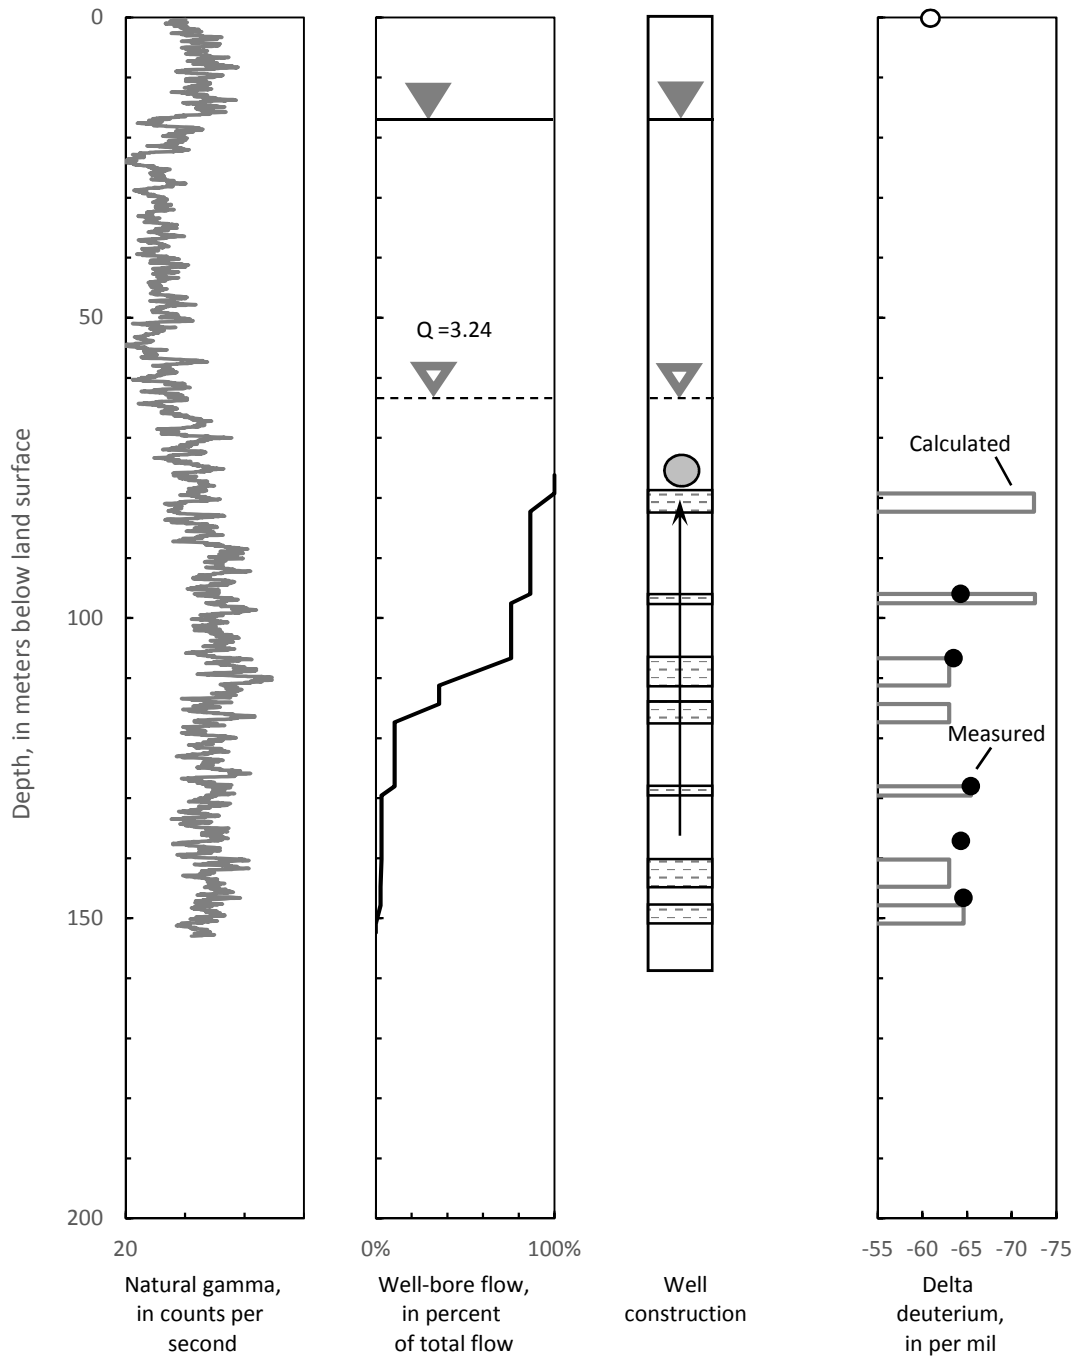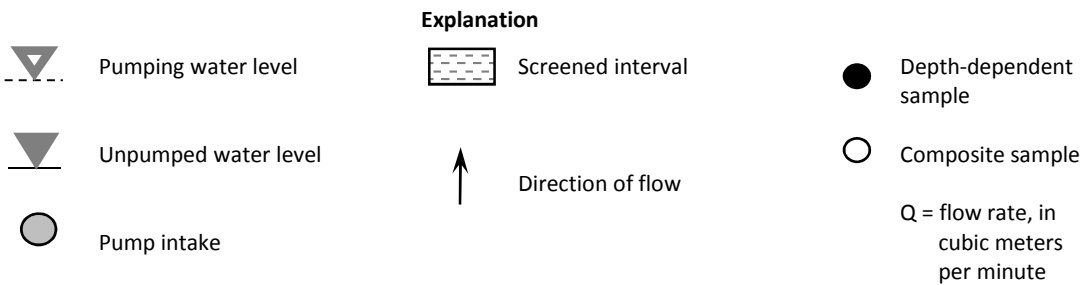

**Fig. S6** Gamma log, pumped well-bore flow, well construction, and delta-deuterium depth-dependent water-quality data from well 2N/6E-11H3, Eastern San Joaquin Groundwater subbasin, California

**Table S1.** Multiple-well site construction information and electromagnetic geophysical logging events, Eastern San Joaquin Groundwater subbasin, California, 2005–2012

| State ID <sup>a</sup>                                                                                 | Site                      | Common name                                                                                                   | USGS ID <sup>b</sup>                                                                        | Screen top                              |                                              | Screen bottom                           |                                              | Surface Elev <sup>c</sup> (m) | Available EM <sup>d</sup> Induction Log Data (Date of collection)                   | Constructed by |
|-------------------------------------------------------------------------------------------------------|---------------------------|---------------------------------------------------------------------------------------------------------------|---------------------------------------------------------------------------------------------|-----------------------------------------|----------------------------------------------|-----------------------------------------|----------------------------------------------|-------------------------------|-------------------------------------------------------------------------------------|----------------|
|                                                                                                       |                           |                                                                                                               |                                                                                             | Depth (m)                               | Elev <sup>c</sup> (m)                        | Depth (m)                               | Elev <sup>c</sup> (m)                        |                               |                                                                                     |                |
| 2N/5E-1A6 (1A6)<br>2N/5E-1A5 (1A5)<br>2N/5E-1A4 (1A4)<br>2N/5E-1A3 (1A3)<br>2N/5E-1A2 (1A2)           | STK-1<br>(OAK GROVE PARK) | STK-1 WELL at 20.7<br>STK-1 WELL at 73.2<br>STK-1 WELL at 115.8<br>STK-1 WELL at 164.6<br>STK-1 WELL at 268.2 | 380316121221505<br>380316121221504<br>380316121221503<br>380316121221502<br>380316121221501 | 17.7<br>67.1<br>109.7<br>158.5<br>262.1 | -16.5<br>-65.8<br>-108.5<br>-157.3<br>-260.9 | 20.7<br>73.2<br>115.8<br>164.6<br>268.2 | -19.5<br>-71.9<br>-114.6<br>-163.4<br>-267.0 | 1.2                           | 5/3/2005, 1/24/2006,<br>4/10/2007, 9/25/2007,<br>4/16/2012                          | USGS           |
| 2N/6E-11H8 (11H8)<br>2N/6E-11H7 (11H7)<br>2N/6E-11H6 (11H6)<br>2N/6E-11H5 (11H5)<br>2N/6E-11H4 (11H4) | STK-2<br>(MORADA LANE)    | STK-2 WELL at 34.8<br>STK-2 WELL at 67.1<br>STK-2 WELL at 91.4<br>STK-2 WELL at 164.6<br>STK-2 WELL at 193.5  | 380207121164101<br>380209121164104<br>380209121164103<br>380209121164102<br>380209121164101 | 33.2<br>61.0<br>85.3<br>158.5<br>187.5  | -25.0<br>-50.0<br>-74.3<br>-147.5<br>-176.5  | 34.8<br>67.1<br>91.4<br>164.6<br>193.5  | -26.6<br>-56.1<br>-80.4<br>-153.6<br>-182.5  | 11                            | 5/13/2005, 1/23/2006,<br>4/10/2007, 9/26/2007,<br>4/19/2012                         | USGS           |
| 1N/6E-4J5 (4J5)<br>1N/6E-4J4 (4J4)<br>1N/6E-4J3 (4J3)                                                 | STK-4<br>(VICTORY PARK)   | STK-4 WELL at 67.1<br>STK-4 WELL at 109.7<br>STK-4 WELL at 170.7                                              | 375735121184903<br>375735121184902<br>375735121184901                                       | 61.0<br>103.6<br>164.6                  | -58.5<br>-101.2<br>-162.2                    | 67.1<br>109.7<br>170.7                  | -64.6<br>-107.3<br>-168.3                    | 2.4                           | 9/13/2005, 1/26/2006,<br>3/30/2007, 9/24/2007,<br>4/18/2012                         | USGS           |
| 2N/6E-8N3 (8N3)<br>2N/6E-8N2 (8N2)<br>2N/6E-8N1 (8N1)                                                 | STK-5<br>(SANDMAN PARK)   | STK-5 WELL at 70.1<br>STK-5 WELL at 131.1<br>STK-5 WELL at 176.8                                              | 380147121205003<br>380147121205002<br>380147121205001                                       | 64.0<br>125.0<br>170.7                  | -63.1<br>-124.1<br>-169.8                    | 70.1<br>131.1<br>176.8                  | -69.2<br>-130.1<br>-175.9                    | 0.9                           | 5/13/2006, 7/13/2006,<br>4/11/2007, 5/24/2007,<br>9/26/2007, 4/18/2012 <sup>e</sup> | USGS           |
| 2N/6E-29H3 (29H3)<br>2N/6E-29H2 (29H2)<br>2N/6E-29H1 (29H1)                                           | STK-6<br>(ATHERTON PARK)  | STK-6 WELL at 79.2<br>STK-6 WELL at 143.3<br>STK-6 WELL at 170.7                                              | 375944121200503<br>375944121200502<br>375944121200501                                       | 73.2<br>137.2<br>164.6                  | -71.6<br>-135.6<br>-163.1                    | 79.2<br>143.3<br>170.7                  | -77.7<br>-141.7<br>-169.2                    | 1.5                           | 5/22/2006, 6/20/2006,<br>4/11/2007, 9/26/2007,<br>4/20/2012                         | USGS           |
| 1N/7E-3D5 (3D5)<br>1N/7E-3D4 (3D4)<br>1N/7E-3D3 (3D3)<br>1N/7E-3D2 (3D2)                              | STK-7<br>(STOCKTON EAST)  | STK-7 WELL at 50.3<br>STK-7 WELL at 88.4<br>STK-7 WELL at 132.6<br>STK-7 WELL at 172.2                        | 375805121121104<br>375805121121103<br>375805121121102<br>375805121121101                    | 44.2<br>82.3<br>126.5<br>166.1          | -31.7<br>-69.8<br>-114.0<br>-153.6           | 50.3<br>88.4<br>132.6<br>172.2          | -37.8<br>-75.9<br>-120.1<br>-159.7           | 12.5                          | 4/17/2012                                                                           | USGS           |
| 3N/9E-12G1 (12G1)<br>3N/9E-12G2 (12G2)<br>3N/9E-12G3 (12G3)<br>3N/9E-12G4 (12G4)                      | CCTR<br>(CALVERAS NORTH)  | CCTR WELL at 132.6<br>CCTR WELL at 111.3<br>CCTR WELL at 70.1<br>CCTR WELL at 33.5                            | 380738120555601<br>380738120555602<br>380738120555603<br>380738120555604                    | 126.5<br>108.2<br>64.0<br>27.4          | -51.8<br>-33.5<br>10.7<br>47.2               | 132.6<br>111.3<br>70.1<br>33.5          | -57.9<br>-36.6<br>4.6<br>41.1                | 74.7                          | --                                                                                  | USGS           |
| 4N/9E-36A1 (36A1)<br>4N/9E-36A2 (36A2)<br>4N/9E-36A3 (36A3)                                           | CCNA<br>(CALVERAS SOUTH)  | CCNA WELL at 118.9<br>CCNA WELL at 82.3<br>CCNA WELL at 41.1                                                  | 380946120554401<br>380946120554402<br>380946120554403                                       | 112.8<br>76.2<br>35.1                   | -33.5<br>3.0<br>44.2                         | 118.9<br>82.3<br>41.1                   | -39.6<br>-3.0<br>38.1                        | 79.2                          | --                                                                                  | USGS           |
| 1N/6E-36C3 (36C3)<br>1N/6E-36C4 (36C4)<br>1N/6E-36C5 (36C5)                                           | SPERRY ROAD               | SPERRY WELL at 140.2<br>SPERRY WELL at 86.0<br>SPERRY WELL at 95.1<br>SPERRY WELL at 37.8                     | 375349121160901<br>375349121160902<br>375349121160903                                       | 134.1<br>79.9<br>92.0<br>34.7           | -129.5<br>-75.3<br>-87.5<br>-30.2            | 140.2<br>86.0<br>95.1<br>37.8           | -135.6<br>-81.4<br>-90.5<br>-33.2            | 4.6                           | 7/15/2004, 1/26/2006,<br>3/29/2007, 9/24/2007,<br>4/17/2012 <sup>e</sup>            | OTHERS         |
| 2N/6E-20E1 (20E1)<br>2N/6E-20E2 (20E2)<br>2N/6E-20E3 (20E3)                                           | SWENSON PARK              | SWENSEN WELL at 153.0<br>SWENSEN WELL at 95.7<br>SWENSEN WELL at 62.2                                         | 380026121204401<br>380026121204402<br>380026121204403                                       | 146.9<br>89.6<br>59.1                   | -145.7<br>-88.4<br>-57.9                     | 153.0<br>95.7<br>62.2                   | -151.8<br>-94.5<br>-61.0                     | 1.2                           | 7/15/2004, 1/24/2006,<br>3/28/2007, 9/25/2007,<br>4/19/2012                         | OTHERS         |
| 2N/6E-12H2 (12H2)<br>2N/6E-12H3 (12H3)                                                                | NORTHEAST MORADA          | NE MORADA WELL at 118.9<br>NE MORADA WELL at 88.4                                                             | 380216121154001<br>380216121154002                                                          | 115.8<br>85.4                           | -105.8<br>-75.3                              | 118.9<br>88.4                           | -108.8<br>-78.3                              | 10.1                          | --                                                                                  | OTHERS         |
| 2N/6E-24P1 (24P1)<br>2N/6E-24P2 (24P2)<br>2N/6E-24P3 (24P3)                                           | BLOSSOM RANCH             | BLOSSOM RANCH WELL at 158.5<br>BLOSSOM RANCH WELL at 137.1<br>BLOSSOM RANCH WELL at 65.5                      | 380004121160601<br>380004121160602<br>380004121160603                                       | 152.4<br>121.9<br>59.4                  | -144.8<br>-114.3<br>-51.8                    | 158.5<br>137.2<br>65.5                  | -150.9<br>-129.6<br>-57.9                    | 7.6                           | --                                                                                  | OTHERS         |
| 2N/7E-7K7 (7K7)<br>2N/7E-07K6 (7K6)                                                                   | EAST MORADA               | E MORADA WELL at 68.6<br>E MORADA WELL at 137.8                                                               | 380207121145702<br>380207121145701                                                          | 65.5<br>134.7                           | -54.3<br>-123.5                              | 68.6<br>137.8                           | -57.3<br>-126.5                              | 11.3                          | --                                                                                  | OTHERS         |

<sup>a</sup> California State Well Numbering System identification

<sup>b</sup> U.S. Geological Survey identification number

<sup>c</sup> Elevation above mean sea level

<sup>d</sup> Electromagnetic induction log data

<sup>e</sup> Obstructions in wells at sites STK-5 and Sperry Road prevented logging to the bottom of the borehole.
